# Supplementary material for: Relationship between Prices of Fixed-dose and Free-equivalent Combination: A Survey of Medicines in China's National Reimbursement Drug List
Source: Research Square preprint supplement (doi:10.21203/rs.3.rs-4831695/v1), 2024-08-29
Supplement: Supplementary file 1 [file 380eac126f9b6a38a66078b5.xlsx]

## Sheet: appendix1_all data
No.	Name of FDC	Whether FDC in VBP	Formulary Drug Categories of FDC	The Number of FECs/APIs	Therapeutic Areas	The Unit Price of FDC	The total Price of FECs	Price Ratio	The Administration of FDC	The Specification of FDC	API 1	The Dosage Form of FEC 1	The Strength of FEC 1	Whether FEC 1 in VBP	The Unit price of FEC 1	API 2	The Dosage Form of FEC 2	The Strength of FEC 2	Whether FEC 2 in VBP	The Unit price of FEC 2	API 3	The Dosage Form of FEC 3	The Strength of FEC 3	Whether FEC 3 in VBP	The Unit price of FEC 3	API 4	The Dosage Form of FEC 4	The Strength of FEC 4	Whether FEC 4 in VBP	The Unit price of FEC 4
1	Omeprazole and Sodium Bicarbonate for Suspension (I)	NO	negotiation catalog（2022）	2	Alimentary tract and metabolism	2.39	2.93913	0.813167	Oral administration	Bag	Omeprazole 20mg	Enteric-coated capsule	20mg	YES（batch 3）	1.3819	Sodium Bicarbonate 1680mg	Tablet	500mg	YES（batch 3）	0.3837	/	/	/	/	/	/	/	/	/	/
2	Omeprazole and Sodium Bicarbonate for Suspension (Ⅱ)	NO	negotiation catalog（2022）	2	Alimentary tract and metabolism	4.15	3.73773	1.1103	Oral administration	Bag	Omeprazole 40mg	Enteric-coated capsule	40mg	YES（batch 3）	2.0474	Sodium Bicarbonate 1680mg	Tablet	500mg	YES（batch 3）	0.3837	/	/	/	/	/	/	/	/	/	/
3	Insulin Degludec and Insulin Aspart Injection	NO	negotiation catalog（2020）	2	Alimentary tract and metabolism	64.36	77.7725	0.827542	Subcutaneous injection	3 mL single-patient-use pen	Insulin Degludec 210iu	Injection solution	300iu	YES（batch 6）	79.2	Insulin Aspart 90iu	Injection solution	300iu	YES（batch 6）	43.9785	/	/	/	/	/	/	/	/	/	/
4	Insulin Degludec and Liraglutide Injection	NO	negotiation catalog（2022）	2	Alimentary tract and metabolism	217.6	292.431	0.744108	Subcutaneous injection	3 mL single-patient-use pen	Insulin Degludec 300iu	Injection solution	300iu	YES（batch 6）	79.2	Liraglutide 10.8mg	Injection solution	18mg	NO	315.27	/	/	/	/	/	/	/	/	/	/
5	Metformin Hydrochloride and Empagliflozin Tablets (Ⅰ)	NO	negotiation catalog（2021）	2	Alimentary tract and metabolism	1.21	2.5917	0.466875	Oral administration	Tablet	Metformin 500mg	Tablet	500mg	YES（batch 3）	0.6987	Empagliflozin 5mg	Tablet	10mg	YES（batch 4）	3.2181	/	/	/	/	/	/	/	/	/	/
6	Clopidogrel Bisulfate and Aspirin Tablets	NO	negotiation catalog（2022）	2	Blood and blood forming organs	4.1	3.16039	1.29731	Oral administration	Tablet	Clopidogrel 75mg	Tablet	75mg	YES（batch 1）	2.9947	Aspirin 100mg	Tablet	300mg	NO	0.3842	/	/	/	/	/	/	/	/	/	/
7	Bisoprolol Fumarate and Amlodipine Besilate Tablets	NO	negotiation catalog（2022）	2	Cardiovascular system	1.54	3.0098	0.511662	Oral administration	Tablet	Bisoprolol 5mg	Tablet	5mg	YES（batch 2）	1.3381	Amlodipine 5mg	Tablet	5mg	YES（batch 1）	1.6717	/	/	/	/	/	/	/	/	/	/
8	Amlodipine Besilate and Folic Acid Tablets (Ⅱ)	NO	negotiation catalog（2021）	2	Cardiovascular system	1.58	2.63186	0.600336	Oral administration	Tablet	Amlodipine 5mg	Tablet	5mg	YES（batch 1）	1.6717	Folic Acid 0.8mg	Tablet	0.4mg	NO	0.5648	/	/	/	/	/	/	/	/	/	/
9	Indacaterol Maleate and Glycopyrronium Bromide Powder for Inhalation, Hard Capsules	NO	negotiation catalog（2019）	2	Respiratory system	7.65	22.6517	0.337723	Inhalation administration	Capsule	Indacaterol 110µg	Powder for Inhalation	150ug	NO	11.182	Glycopyrronium Bromide 50µg	Powder for Inhalation	50µg	NO	13.833	/	/	/	/	/	/	/	/	/	/
10	Glycopyrronium Bromide and Formoterol Fumarate Inhalation Aerosol	NO	negotiation catalog（2020）	2	Respiratory system	192	603.679	0.31805	Inhalation administration	120 presses/bottle	Glycopyrronium Bromide 7.2µg/press	Powder for Inhalation	50µg	NO	13.833	Formoterol 5µg/press	Inhalation Aerosol	12µg	NO	3.7	/	/	/	/	/	/	/	/	/	/
11	Budesonide, Glycopyrronium Bromide and Formoterol Fumarate Inhalation Aerosol	NO	negotiation catalog（2020）	3	Respiratory system	239	755.505	0.316345	Inhalation administration	120 presses/bottle	Budesonide 160µg/press	Inhalation Aerosol	200ug	NO	1.57	Glycopyrronium Bromide 7.2µg/press	Powder for Inhalation	50µg	NO	13.833	Formoterol 4.8µg/press	Inhalation Aerosol	12µg	NO	3.7	/	/	/	/	/
12	Beclometasone Dipropionate，Formoterol Fumarate and Glycopyrrolate Inhalation Aerosol	NO	negotiation catalog（2022）	3	Respiratory system	232	884.334	0.262344	Inhalation administration	120 presses/bottle	Beclometasone 100µg/press	Inhalation Aerosol	50µg	NO	0.239101	Formoterol 6µg/press	Inhalation Aerosol	12µg	NO	3.7	Glycopyrronium Bromide 12.5µg/press	Powder for Inhalation	50µg	NO	13.833	/	/	/	/	/
13	Indacaterol Acetate, Glycopyrronium Bromide and Mometasone Furoate Powder for Inhalation（Ⅱ）	NO	negotiation catalog（2022）	3	Respiratory system	9.65967	26.997	0.357805	Inhalation administration	30 capsules/bottle	Indacaterol 150µg	Powder for Inhalation	150ug	NO	11.182	Glycopyrronium Bromide 50µg	Powder for Inhalation	50µg	NO	13.833	Mometasone 160µg	Nasal Spray	50µg	NO	0.813572	/	/	/	/	/
14	Indacaterol Acetate and Mometasone Furoate Powder for Inhalation（Ⅱ）	NO	negotiation catalog（2022）	2	Respiratory system	6.193	13.164	0.470449	Inhalation administration	30 capsules/bottle	Indacaterol 150µg	Powder for Inhalation	150ug	NO	11.182	Mometasone 160µg	Nasal Spray	50µg	NO	0.813572	/	/	/	/	/	/	/	/	/	/
15	Indacaterol Acetate and Mometasone Furoate Powder for Inhalation（Ⅲ）	NO	negotiation catalog（2022）	2	Respiratory system	7.493	14.5514	0.514933	Inhalation administration	30 capsules/bottle	Indacaterol 150µg	Powder for Inhalation	150ug	NO	11.182	Mometasone 320µg	Nasal Spray	51µg	NO	0.813572	/	/	/	/	/	/	/	/	/	/
16	Brinzolamide and Timolol Maleate Eye Drops	NO	negotiation catalog（2020）	2	Sensory organs	41	83.1071	0.493339	Ophthalmic administration	5ml	Brinzolamide 50mg	Eyes Drops	50mg	NO	60.32	Timolol 25mg	Eyes Drops	25mg	NO	22.7871	/	/	/	/	/	/	/	/	/	/
17	Brinzolamide and Brimonidine Eye Drops	NO	negotiation catalog（2020）	2	Sensory organs	63	109.129	0.577298	Ophthalmic administration	5ml	Brinzolamide 50mg	Eyes Drops	50mg	NO	60.32	Brimonidine 10mg	Eyes Drops	10mg	NO	48.8091	/	/	/	/	/	/	/	/	/	/
18	Pioglitazone Hydrochloride and Metformin Hydrochloride Tablets	NO	regular catalog	2	Alimentary tract and metabolism	2.5561	3.0033	0.851097	Oral administration	Tablet	Pioglitazone 15mg	Tablet	15mg	YES（batch 7）	2.3046	Metformin 500mg	Tablet	500mg	YES（batch 3）	0.6987	/	/	/	/	/	/	/	/	/	/
19	Metformin Hydrochloride and Glipizide Tablets	NO	regular catalog	2	Alimentary tract and metabolism	1.8429	0.5982	3.08074	Oral administration	Tablet	Metformin 250mg	Tablet	250mg	YES（batch 3）	0.4072	Glipizide 2.5mg	Tablet	2.5mg	YES（batch 5）	0.191	/	/	/	/	/	/	/	/	/	/
20	Repaglinide and Metformin Hydrochloride Tablets（Ⅰ）	NO	regular catalog	2	Alimentary tract and metabolism	2.2966	1.6108	1.42575	Oral administration	Tablet	Repaglinide 1mg	Tablet	1mg	YES（batch 4）	0.9121	Metformin 500mg	Tablet	500mg	YES（batch 3）	0.6987	/	/	/	/	/	/	/	/	/	/
21	Metformin Hydrochloride and Vildagliptin Tablets（Ⅱ）	YES（batch 7）	regular catalog	2	Alimentary tract and metabolism	3.875	4.1343	0.937281	Oral administration	Tablet	Metformin 850mg	Tablet	850mg	YES（batch 3）	1.4032	Vildagliptin 50mg	Tablet	50mg	YES（batch 3）	2.7311	/	/	/	/	/	/	/	/	/	/
22	Linagliptin and Metformin Hydrochloride Tablets（Ⅱ）	NO	regular catalog	2	Alimentary tract and metabolism	5.6978	5.80267	0.981927	Oral administration	Tablet	Metformin 850mg	Tablet	850mg	YES（batch 3）	1.4032	Linagliptin 2.5mg	Tablet	5mg	NO	7.4791	/	/	/	/	/	/	/	/	/	/
23	Sitagliptin Phosphate/metformin Hydrochloride Tablets（Ⅱ）	NO	regular catalog	2	Alimentary tract and metabolism	4.8814	5.59208	0.872913	Oral administration	Tablet	Sitagliptin 50mg	Tablet	100mg	NO	7.1211	Metformin 850mg	Tablet	850mg	YES（batch 3）	1.4032	/	/	/	/	/	/	/	/	/	/
24	Saxagliptin and Metformin Hydrochloride Sustained-release Tablets (Ⅰ)	NO	regular catalog	2	Alimentary tract and metabolism	9.7142	6.62347	1.46663	Oral administration	Tablet	Metformin 1g	Sustained-release Tablets	0.5g	YES（batch 3）	0.7821	Saxagliptin 5mg	Tablet	5mg	YES（batch 5）	5.2939	/	/	/	/	/	/	/	/	/	/
25	Solium Lactate Ringer's Injection	NO	regular catalog	4	Blood and blood forming organs	19.9678	62.4063	0.319965	Intravenous injection	Injection 500ml	Solium Lactate 1.55g	Solution for Injection	20ml: 2.24g	NO	63.6133	Sodium Chloride 3.00g	Solution for Injection	500ml: 4.5g	NO	4.7318	Potassium Chloride 0.15g	Solution for Injection	10ml:1g	NO	3.7093	Calcium Chloride0.1g	Solution for Injection	10ml:300mg	NO	23.377
26	Glycerol Fructose and Sodium Chloride Injection	NO	regular catalog	2	Blood and blood forming organs	24.8521	34.2435	0.725746	Intravenous injection	Injection 250ml	Glycerol Sodium Chloride 250ml: 25g/2.25g	Solution for Injection	250ml: 25g/2.25g	NO	9.625	Fructose 12.5g	Solution for Injection	250ml: 12.5g	NO	24.6185	/	/	/	/	/	/	/	/	/	/
27	Amlodipine Besylate and Atorvastatin Calcium Tablets	NO	regular catalog	2	Cardiovascular system	5.7403	3.9046	1.47014	Oral administration	Tablet	Amlodipine 5mg	Tablet	5mg	YES（batch 1）	1.6717	Atorvastatin Calcium 10mg	Tablet	10mg	YES（batch 1）	2.2329	/	/	/	/	/	/	/	/	/	/
28	Amlodipine Besylate and Benazepril Hydrochloride Tablets(Ⅱ)	NO	regular catalog	2	Cardiovascular system	3.841	3.0456	1.26116	Oral administration	Tablet	Benazepril 10mg	Tablet	10mg	YES（batch 5）	1.3739	Amlodipine 5mg	Tablet	5mg	YES（batch 1）	1.6717	/	/	/	/	/	/	/	/	/	/
29	Benazepril Hydrochloride and Hydrochlorothiazide Tablets	NO	regular catalog	2	Cardiovascular system	2.73	1.41608	1.92786	Oral administration	Tablet	Benazepril 10mg	Tablet	10mg	YES（batch 5）	1.3739	Hydrochlorothiazide 12.5mg	Tablet	25mg	NO	0.0717	/	/	/	/	/	/	/	/	/	/
30	Compound Captopril Tablets	NO	regular catalog	2	Cardiovascular system	0.2023	0.494324	0.409245	Oral administration	Tablet	Captopril 10mg	Tablet	25mg	YES（batch 3）	0.9484	Hydrochlorothiazide 6mg	Tablet	25mg	NO	0.0717	/	/	/	/	/	/	/	/	/	/
31	Lisinopril and Hydrochlorothiazide Tablets	NO	regular catalog	2	Cardiovascular system	1.4995	1.02718	1.45983	Oral administration	Tablet	Lisinopril 10mg	Tablet	10mg	YES（batch 1）	0.985	Hydrochlorothiazide 12.5mg	Tablet	25mg	NO	0.0717	/	/	/	/	/	/	/	/	/	/
32	Enalapril Maleate and Folic Acid Tablets	NO	regular catalog	2	Cardiovascular system	4.79	1.55546	3.07947	Oral administration	Tablet	Enalapril 10mg	Tablet	10mg	NO	0.5953	Folic Acid 0.8mg	Tablet	0.4mg	NO	0.5648	/	/	/	/	/	/	/	/	/	/
33	Perindopril and Indapamide Tablets	NO	regular catalog	2	Cardiovascular system	3.6852	2.13533	1.72582	Oral administration	Tablet	Perindopril 4mg	Tablet	4mg	YES（batch 4）	1.9478	Indapamide 1.25mg	Tablet	2.5mg	YES（batch 2）	0.3188	/	/	/	/	/	/	/	/	/	/
34	Arginine and Amlodipine Besylate Tablets (Ⅲ)	NO	regular catalog	2	Cardiovascular system	6.21	5.59979	1.10897	Oral administration	Tablet	Perindopril 10mg	Tablet	4mg	YES（batch 4）	1.9478	Amlodipine 5mg	Tablet	5mg	YES（batch 1）	1.6717	/	/	/	/	/	/	/	/	/	/
35	Olmesartan Medoxomil and Hydrochlorothiazide Tablets	NO	regular catalog	2	Cardiovascular system	6.096	2.96388	2.05677	Oral administration	Tablet	Olmesartan Medoxomil 20mg	Tablet	20mg	YES（batch 2）	2.9217	Hydrochlorothiazide 12.5mg	Tablet	25mg	NO	0.0717	/	/	/	/	/	/	/	/	/	/
36	Irbesartan and Hydrochlorothiazide Tablets	YES（batch 1）	regular catalog	2	Cardiovascular system	1.7204	2.24588	0.766026	Oral administration	Tablet	Irbesartan 150mg	Tablet	150mg	YES（batch 1）	2.2037	Hydrochlorothiazide 12.5mg	Tablet	25mg	NO	0.0717	/	/	/	/	/	/	/	/	/	/
37	Telmisartan and Hydrochlorothiazide Tablets	NO	regular catalog	2	Cardiovascular system	2.8085	1.17318	2.39393	Oral administration	Tablet	Telmisartan 40mg	Tablet	40mg	YES（batch 4）	1.131	Hydrochlorothiazide 12.5mg	Tablet	25mg	NO	0.0717	/	/	/	/	/	/	/	/	/	/
38	Valsartan and Amlodipine Tablets (I)	YES（batch 4）	regular catalog	2	Cardiovascular system	4.1782	4.036	1.03523	Oral administration	Tablet	Valsartan 80mg	Tablet	80mg	YES（batch 3）	2.3643	Amlodipine 5mg	Tablet	5mg	YES（batch 1）	1.6717	/	/	/	/	/	/	/	/	/	/
39	Valsartan and Hydrochlorothiazide Tablets	YES（batch 4）	regular catalog	2	Cardiovascular system	2.7284	2.40648	1.13377	Oral administration	Tablet	Valsartan 80mg	Tablet	80mg	YES（batch 3）	2.3643	Hydrochlorothiazide 12.5mg	Tablet	25mg	NO	0.0717	/	/	/	/	/	/	/	/	/	/
40	Olmesartan Medoxomil and Amlodipine Besylate Tablets	NO	regular catalog	2	Cardiovascular system	6.1429	4.5934	1.33733	Oral administration	Tablet	Olmesartan Medoxomil 20mg	Tablet	20mg	YES（batch 2）	2.9217	Amlodipine 5mg	Tablet	5mg	YES（batch 1）	1.6717	/	/	/	/	/	/	/	/	/	/
41	Telmisartan and Amlodipine Tablets	NO	regular catalog	2	Cardiovascular system	7.1285	3.9157	1.82049	Oral administration	Tablet	Telmisartan 80mg	Tablet	80mg	YES（batch 4）	2.244	Amlodipine 5mg	Tablet	5mg	YES（batch 1）	1.6717	/	/	/	/	/	/	/	/	/	/
42	Candesartan Cilexetil and Hydrochlorothiazide Tablets	NO	regular catalog	2	Cardiovascular system	4.7328	2.6215	1.80538	Oral administration	Tablet	Candesartan Cilexetil 16mg	Tablet	4mg	YES（batch 2）	0.8925	Hydrochlorothiazide 12.5mg	Tablet	25mg	NO	0.0717	/	/	/	/	/	/	/	/	/	/
43	Triamcinolone Acetonide Acetate and Econazole Nitrate Cream	NO	regular catalog	2	Dermatologicals	10.5771	15.8875	0.66575	Transdermal administration	Cream 15g	Econazole 150mg	Cream	100mg	NO	2.4	Triamcinolone Acetonide 15mg	Cream	2.5mg	NO	3.2	/	/	/	/	/	/	/	/	/	/
44	Calcipotriol and Betamethasone Ointment	NO	regular catalog	2	Dermatologicals	145.28	88.2222	1.64675	Transdermal administration	Ointment 15g	Calcipotriol 0.75mg	Ointment	0.75mg	NO	55.445	Betamethasone 7.5mg	Ointment	15mg	NO	61.2933	/	/	/	/	/	/	/	/	/	/
45	Tazarotene and Betamethasone Dipropionate Cream	NO	regular catalog	2	Dermatologicals	143.75	44.8608	3.20436	Transdermal administration	Cream 15g	Tazarotene 7.5mg	Cream	15mg	NO	14.97	Betamethasone 7.5mg	Cream	15mg	NO	61.2933	/	/	/	/	/	/	/	/	/	/
46	Compound Sulfadiazine Zinc Gel	NO	regular catalog	2	Antiinfective for systemic use	78	44.8582	1.73881	Transdermal administration	Gel 30g	silver sulfadiazine 0.3g	Cream	5g	NO	134.28	Sulfadiazine Zinc 0.6g	Cream	1g	NO	39.35	/	/	/	/	/	/	/	/	/	/
47	Nifuratel and Nystatin Vaginal Soft Capsules	NO	regular catalog	2	Genito urinary system and sex hormones	5.7909	5.42479	1.06749	Transdermal administration	Capsule	Nifuratel 500mg	Capsule	100mg	NO	1.2622	Nystatin 200,000 units	Tablet	500,000 units	NO	0.39	/	/	/	/	/	/	/	/	/	/
48	Complex Packing Estradiol Tablets/Estradiol and Dydrogesterone Tablets	NO	regular catalog	2	Genito urinary system and sex hormones	4.68651	4.93824	0.949023	Oral administration	Tablet	Estradiol 1mg	Tablet	1mg	NO	1.3261	Estradiol 1mg; Dydrogesterone 10mg	Tablet	1mg; 10mg	NO	3.61214	/	/	/	/	/	/	/	/	/	/
49	Ampicillin Sodium and Sulbactam Sodium for lnjection	NO	regular catalog	2	Antiinfective for systemic use	24.2996	38.8733	0.625097	Intravenous injection	Solution 750mg (2:1)	Ampicillin Sodium 0.5g	Solution for Injection	500mg	NO	14.3044	Sulbactam Sodium 0.25g	Solution for Injection	250mg	NO	24.5689	/	/	/	/	/	/	/	/	/	/
50	Piperacillin Sodium and Sulbactam Sodium for lnjection	NO	regular catalog	2	Antiinfective for systemic use	36.0687	83.095	0.434066	Intravenous injection	Solution 2.5g (4:1)	Piperacillin 2g	Solution for Injection	2g	NO	45.8435	Sulbactam Sodium 0.5g	Solution for Injection	500mg	NO	37.2515	/	/	/	/	/	/	/	/	/	/
51	Thambutol Hydrochloride,Pyrazinamide,Rifampicin and Isoniazid Tablets(Ⅱ)	NO	regular catalog	4	Antiinfective for systemic use	4.2275	1.26559	3.34034	Oral administration	Tablet	Rifampin 0.15g	Capsule	150mg	NO	0.3951	Isoniazid 0.075g	Tablet	0.1g	YES（batch 2）	0.1677	Pyrazinamide 0.4g	Tablet	0.25g	4	0.3382	Thambutol Hydrochloride 0.275g	Tablet	0.25g	3	0.2336
52	Rifampin and Isoniazid Tablets	NO	regular catalog	2	Antiinfective for systemic use	3	1.23794	2.42339	Oral administration	Tablet	Rifampin 0.3g	Capsule	300mg	NO	1.0092	Isoniazid 0.15g	Tablet	0.1g	YES（batch 2）	0.1677	/	/	/	/	/	/	/	/	/	/
53	Rifampin Isoniazid and Pyrazinamide Tablets	NO	regular catalog	3	Antiinfective for systemic use	0.5216	0.812623	0.641872	Oral administration	Tablet	Rifampin 0.12g	Capsule	150mg	NO	0.3951	Isoniazid 0.08g	Tablet	0.1g	YES（batch 2）	0.1677	Pyrazinamide 0.25g	Tablet	0.25g	4	0.3382	/	/	/	/	/
54	Emtricitabine and Tenofovir Disoproxil Fumarate Tablets	YES（batch 4）	regular catalog	2	Antiinfective for systemic use	36.4296	29.9841	1.21496	Oral administration	Tablet	Emtricitabine 200mg	Capsule	200mg	NO	22.7642	Tenofovir Disoproxil 300mg	Tablet	300mg	YES（batch 1）	7.2199	/	/	/	/	/	/	/	/	/	/
55	Paracetamol and Dihydrocodeine Tartrate Tablets	NO	regular catalog	2	Nervous system	1.5292	8.57081	0.17842	Oral administration	Tablet	Acetaminophen 500mg	Tablet	0.5g	YES（batch 2）	0.5061	Dihydrocodeine 10mg	Tablet	30mg	NO	18.7	/	/	/	/	/	/	/	/	/	/
56	Paracetamol and Tramadol Hydrochloride Tablets	NO	regular catalog	2	Nervous system	2.1888	2.21836	0.986674	Oral administration	Tablet	Tramadol 37.5mg	Tablet	50mg	NO	2.3113	Acetaminophen 325mg	Tablet	0.5g	YES（batch 2）	0.5061	/	/	/	/	/	/	/	/	/	/
57	Beclometasone Dipropionate and Formoterol Inhalation Aerosol	NO	regular catalog	2	Respiratory system	221.61	309.953	0.714979	Inhalation administration	120 presses/bottle	Beclometasone 100μg/press	Inhalation Aerosol	50µg	NO	0.239101	Formoterol 6μg/press	Powder for Inhalation	12µg	NO	3.7	/	/	/	/	/	/	/	/	/	/
58	Budesonide and Formoterol Fumarate Powder for Inhalation(I)	NO	regular catalog	2	Respiratory system	155.1	137.778	1.12573	Inhalation administration	60 presses/bottle	Budesonide 80μg/press	Inhalation Aerosol	100ug	NO	0.6525	Formoterol 4.5μg/press	Powder for Inhalation	12µg	NO	3.7	/	/	/	/	/	/	/	/	/	/
59	Salmeterol Xinafoate and Fluticasone Propionate Powder for Inhalation	NO	regular catalog	2	Respiratory system	132.26	167.182	0.791113	Inhalation administration	60 presses/bottle	Salmeterol 50μg/press	Powder for Inhalation	25ug*60 press	NO	31.7925	Fluticasone 100μg/press	Powder for Inhalation	50ug*60press	NO	66.55	/	/	/	/	/	/	/	/	/	/
60	Compound Ipratropium Bromide Solution for Inhalation	YES（batch 5）	regular catalog	2	Respiratory system	3.6866	18.0796	0.203909	Inhalation administration	Solution 2.5ml	Ipratropium Bromide 0.5mg	Solution for Inhalation	0.5mg	YES（batch 5）	3.5863	Salbutamol2.5mg	Solution for Inhalation	5mg	YES（batch 4）	14.4933	/	/	/	/	/	/	/	/	/	/
61	Sulfate Gentamicin and Fluorometholone Eye Drops	NO	regular catalog	2	Sensory organs	29.02	36.0434	0.80514	Ophthalmic administration	5ml	Gentamicin 15,000 units	Eye Drops	40,000 units	NO	46.0545	Fluorometholone 5mg	Eye Drops	5mg	NO	14.3075	/	/	/	/	/	/	/	/	/	/
62	Tobramycin and Dexamethasone Eye Drops	NO	regular catalog	2	Sensory organs	27.6094	84.3631	0.327269	Ophthalmic administration	5ml	Tobramycin 15mg	Eye Drops	15mg	NO	7.6278	Dexamethason 5mg	Eye Drops	1.25mg	NO	26.552	/	/	/	/	/	/	/	/	/	/
63	Oxycodone and Acetaminophen Tablets	NO	regular catalog	2	Nervous system	8.523	6.36841	1.33833	Oral administration	Tablet	Acetaminophen 325mg	Tablet	0.5g	YES（batch 2）	0.5061	Oxycodone 5mg	Sustained-release Tablets	40mg	NO	29.5	/	/	/	/	/	/	/	/	/	/

## Sheet: appendix2_dosage form ratio
Table : The Dosage Form Ratio for Common Chemical Drugs and Biopharmaceuticals
Dosage form		number	unit	formula	ratio
Tablet（oral administration）	Conventional tablet	(1)	Per tablet	—	1
	Chewable tablet	(2)	Per tablet	（2）÷（1）	1.05
	Lozenge	(3)	Per tablet	（3）÷（1）	1.05
	Enteric-coated tablet	(4)	Per tablet	（4）÷（1）	1.1
	Dispersible tablet	(5)	Per tablet	（5）÷（1）	1.2
	Effervescent tablet	(6)	Per tablet	（6）÷（1）	1.3
Capsule（oral administration）	Hard capsule	(7)	Per capsule	（7）÷（1）	1
	Enteric-coated capsule	(8)	Per capsule	（8）÷（7）	1.1
	Soft capsule	(9)	Per capsule	（9）÷（7）	1.2
Granules and solution formulations（oral administration）	Granules	(10)	Per package	（10）÷（1）	1.2
	premix	(11)	Per package	（11）÷（10）	0.9
	oral solution（dropper）	(12)	Per tube	（12）÷（10）	1
	dry powder for suspension	(13)	Per package	（13）÷（10）	1.1
	Effervescent granules	(14)	Per package	（14）÷（10）	1.1
Source：Chinese Pharmaceutical Differential Pricing Rules

## Sheet: appendix3_calculation example
Calculation example:

## Sheet: appendix4_price distribution
The price of FDC	The price of FEC		5.7909
0.2023	0.0717		2.2183
0.5216	0.0717
1.21	0.0717
1.4995	0.0717			FDC	FEC
1.5292	0.0717		(0,1]	2	43
1.54	0.0717		(1,2]	7	22
1.58	0.0717		(2,3]	8	12
1.7204	0.0717		(3,4]	4	10
1.8429	0.1677		(4,5]	8	1
2.1888	0.1677		(5,6]	3	1
2.2966	0.1677		(6,7]	4	0
2.39	0.191		(7,8]	3	4
2.5561	0.2336		(8,9]	1	0
2.7284	0.239101		(9,10]	2	1
2.73	0.239101		(10,50]	9	28
2.8085	0.3188		(50,+∞]	12	12
3	0.3382
3.6852	0.3382
3.6866	0.3837
3.841	0.3837
3.875	0.3842
4.1	0.39
4.15	0.3951
4.1782	0.3951
4.2275	0.4072
4.68651	0.5061
4.7328	0.5061
4.79	0.5061
4.8814	0.5648
5.6978	0.5648
5.7403	0.5953
5.7909	0.6525
6.096	0.6987
6.1429	0.6987
6.193	0.6987
6.21	0.7821
7.1285	0.813572
7.493	0.813572
7.65	0.813572
8.523	0.8925
9.65967	0.9121
9.7142	0.9484
10.5771	0.985
19.9678	1.0092
24.2996	1.131
24.8521	1.2622
27.6094	1.3261
29.02	1.3381
36.0687	1.3739
36.4296	1.3739
41	1.3819
63	1.4032
64.36	1.4032
78	1.4032
132.26	1.57
143.75	1.6717
145.28	1.6717
155.1	1.6717
192	1.6717
217.6	1.6717
221.61	1.6717
232	1.6717
239	1.6717
	1.9478
	1.9478
	2.0474
	2.2037
	2.2329
	2.244
	2.3046
	2.3643
	2.3643
	2.4
	2.7311
	2.9217
	2.9217
	2.9947
	3.2
	3.2181
	3.3113
	3.5863
	3.7
	3.7
	3.7
	3.7
	3.7
	3.7093
	4.7318
	5.2939
	7.1211
	7.2199
	7.4791
	7.6278
	9.625
	11.182
	11.182
	11.182
	11.182
	13.833
	13.833
	13.833
	13.833
	13.833
	14.3044
	14.3075
	14.4933
	14.97
	18.7
	22.7642
	22.7871
	23.377
	24.5689
	24.6185
	26.552
	29.5
	32.7925
	37.2515
	39.35
	43.9785
	45.8435
	46.0545
	48.8091
	50.57
	55.445
	60.32
	60.32
	61.2933
	61.2933
	63.6133
	66.55
	79.2
	79.2
	134.28
	315.27
